# Supplementary material for: Organelle Phylogenomics and Extensive Conflicting Phylogenetic Signals in the Monocot Order Poales
Source: Front Plant Sci. 2022 Jan 31;12:824672. doi: 10.3389/fpls.2021.824672 (PMC8841755; doi:10.3389/fpls.2021.824672)
Supplement: Supplementary file 2 [file Table_2.XLSX]

## Sheet: Sheet1
Table S2. Collection information, sequencing information of mitochondrial data for all taxa sampled in this study.
Family	Genus	Species	Material source	Voucher	GenBank number
Ingroup
Anarthriaceae	Anarthria	Anarthria humilis Nees	Royal Botanic Gardens, Kew	WHKG005	OL839992
Bromeliaceae	Cryptanthus	Cryptanthus acaulis (Lindl.) Beer	The Germplasm Bank of Wild Species	WH1914	OL839997
	Guzmania	Guzmania conifera (André) André ex Mez	The Germplasm Bank of Wild Species	WH1913	OL840017
	Neoregelia	Neoregelia sp.	The Germplasm Bank of Wild Species	WH1915	OL840029
	Vriesea	Vriesea x poelmanii	The Germplasm Bank of Wild Species	WH1912	OL840039
Centrolepidaceae	Centrolepis	Centrolepis aristata (R.Br.) Roem. & Schult.	Royal Botanic Gardens, Kew	WHKG008	OL839996
Cyperaceae	Bolboschoenus	Bolboschoenus planiculmis (F.Schmidt) T.V.Egorova	The Germplasm Bank of Wild Species	14CS9287	OL839993
	Carex	Carex sp.	The Germplasm Bank of Wild Species	SCSB-B-000526	OL839994
	Carex	Carex gibba Wahlenb.	The Germplasm Bank of Wild Species	SCU-08150	OL839995
	Cyperus	Cyperus difformis L.	The Germplasm Bank of Wild Species	YNS0782	OL839998
	Cyperus	Cyperus glomeratus L.	The Germplasm Bank of Wild Species	TianXH504	OL839999
	Cyperus	Cyperus michelianus (L.) Delile	The Germplasm Bank of Wild Species	TianXH574	OL840000
	Cyperus	Cyperus sp.	The Germplasm Bank of Wild Species	YangQE3368	OL840001
	Gahnia	Gahnia tristis Nees	The Germplasm Bank of Wild Species	TanCM1845	OL840013
	Isolepis	Isolepis setacea (L.) R.Br.	The Germplasm Bank of Wild Species	11CS3345	OL840018
	Kyllinga	Kyllinga nemoralis (J.R.Forst. & G.Forst.) Dandy ex Hutch. & Dalziel	The Germplasm Bank of Wild Species	12CS5221	OL840026
	Pycreus	Pycreus flavidus (Retz.) T.Koyama	The Germplasm Bank of Wild Species	MJ-791	OL840033
Ecdeiocoleaceae	Ecdeiocolea	Ecdeiocolea monostachya F.Muell.	Royal Botanic Gardens, Kew	WHKG003	OL840004
	Georgeantha	Georgeantha hexandra B.G.Briggs & L.A.S.Johnson	Royal Botanic Gardens, Kew	WHKG004	OL840014
Eriocaulaceae	Eriocaulon	Eriocaulon sp.	The Germplasm Bank of Wild Species	TanCM1256	OL840011
	Eriocaulon	Eriocaulon alpestre Hook.f. & Thomson ex Körn.	The Germplasm Bank of Wild Species	08CS340	OL840005
	Eriocaulon	Eriocaulon australe R.Br.	The Germplasm Bank of Wild Species	SC0114	OL840006
	Eriocaulon	Eriocaulon brownianum Mart.	The Germplasm Bank of Wild Species	YNS0439	OL840007
	Eriocaulon	Eriocaulon cinereum R.Br.	The Germplasm Bank of Wild Species	08CS973	OL840008
	Eriocaulon	Eriocaulon henryanum Ruhland	The Germplasm Bank of Wild Species	15PX110	OL840009
	Eriocaulon	Eriocaulon schochianum Hand.-Mazz.	The Germplasm Bank of Wild Species	12CS4676	OL840010
	Paepalanthus	Paepalanthus alpinus Körn.	The Germplasm Bank of Wild Species	19CS18767	OL840030
Flagellariaceae	Flagellaria	Flagellaria indica L. 2	GenBank	-	DQ916707
	Flagellaria	Flagellaria indica L. 1	The Germplasm Bank of Wild Species	Y2590	OL840012
Joinvilleaceae	Joinvillea	Joinvillea plicata (Hook.f.) Newell & B.C.Stone	Royal Botanic Gardens, Kew	WHKG001	OL840020
	Joinvillea	Joinvillea ascendens Gaudich. ex Brongn. & Gris 1	GenBank	-	DQ916708
	Joinvillea	Joinvillea ascendens Gaudich. ex Brongn. & Gris 2	Royal Botanic Gardens, Kew	WHKG002	OL840019
	Joinvillea	Joinvillea sp.	The Germplasm Bank of Wild Species	Yi14364	OL840021
Juncaceae	Juncus	Juncus alatus Franch. & Sav.	The Germplasm Bank of Wild Species	LuoY260	OL840022
	Juncus	Juncus compressus Jacq.	The Germplasm Bank of Wild Species	WH1902	OL840023
	Juncus	Juncus grisebachii Buchenau	The Germplasm Bank of Wild Species	SunH-07ZX-3139	OL840024
	Juncus	Juncus himalensis Klotzsch	The Germplasm Bank of Wild Species	LiJ720	OL840025
Mayacaceae	Mayaca	Mayaca fluviatilis Aubl. 1	The Germplasm Bank of Wild Species	F553	OL840027
	Mayaca	Mayaca fluviatilis Aubl. 2	The Germplasm Bank of Wild Species	WH202101	OL840028
Poaceae	Sorghum	Sorghum bicolor (L.) Moench	GenBank	-	NC_008360
	Aegilops	Aegilops speltoides subsp. ligustica (Savign.) Zhuk.	GenBank	-	NC_022666
	Eleusine	Eleusine indica (L.) Gaertn.	GenBank	-	NC_040989
	Guaduella	Guaduella macrostachys (K.Schum.) Pilg.	Royal Botanic Gardens, Kew	WHKG015	OL840015
	Guaduella	Guaduella oblonga Hutch. ex Clayton	Royal Botanic Gardens, Kew	WHKG016	OL840016
	Oryza	Oryza minuta J.Presl	GenBank	-	NC_029816
	Oryza	Oryza sativa L. Japonica_Group	GenBank	-	NC_011033
	Oryza	Oryza rufipogon Griff.	GenBank	-	NC_013816
	Oryza	Oryza sativa L. Indica Group	GenBank	-	NC_007886
	Puelia	Puelia olyriformis (Franch.) Clayton	Royal Botanic Gardens, Kew	WHKG017	OL840032
	Saccharum	Saccharum officinarum L.	GenBank	-	NC_031164
	Tripsacum	Tripsacum dactyloides (L.) L.	GenBank	-	NC_008362
	Triticum	Triticum aestivum L.	GenBank	-	NC_036024
	Triticum	Triticum timopheevii (Zhuk.) Zhuk.	GenBank	-	NC_022714
	Zea	Zea mays L. 1	GenBank	-	NC_007982
	Zea	Zea mays L. 2	GenBank	-	NC_008332
	Zea	Zea perennis (Hitchc.) Reeves & Mangelsd.	GenBank	-	NC_008331
	Zea	Zea luxurians (Durieu & Asch.) R.M.Bird	GenBank	-	NC_008333
Rapateaceae	Epidryos	Epidryos allenii (Steyerm.) Maguire	GenBank	-	DQ916715
	Rapatea	Rapatea xiphoides Sandwith	GenBank	-	DQ916716
	Stegolepis	Stegolepis parvipetala Steyerm.	GenBank	-	DQ916717
Restionaceae	Baloskion	Baloskion tetraphyllum (Labill.) B.G.Briggs & L.A.S.Johnson	GenBank	-	DQ916718
	Dapsilanthus	Dapsilanthus disjunctus (Mast.) B.G.Briggs & L.A.S.Johnson 1	The Germplasm Bank of Wild Species	14CS8760	OL840002
	Dapsilanthus	Dapsilanthus disjunctus (Mast.) B.G.Briggs & L.A.S.Johnson 2	The Germplasm Bank of Wild Species	WHCY002-1	OL840003
	Thamnochortus	Thamnochortus cinereus H.P.Linder	GenBank	-	DQ916719
Thurniaceae	Prionium	Prionium serratum (L.f.) Drège	Royal Botanic Gardens, Kew	WHKG011	OL840031
	Thurnia	Thurnia sphaerocephala (Rudge) Hook.f.	Royal Botanic Gardens, Kew	WHKG012	OL840035
Typhaceae	Sparganium	Sparganium confertum Y.D.Chen	The Germplasm Bank of Wild Species	WH-2013-079	OL840034
	Typha	Typha lugdunensis P.Chabert	The Germplasm Bank of Wild Species	ZhangDY408	OL840036
	Typha	Typha minima Funck	The Germplasm Bank of Wild Species	08CS408	OL840037
	Typha	Typha sp.	The Germplasm Bank of Wild Species	11CS3675	OL840038
Xyridaceae	Xyris	Xyris pauciflora Willd.	The Germplasm Bank of Wild Species	14CS8914	OL840041
	Xyris	Xyris indica L.	The Germplasm Bank of Wild Species	14CS8759	OL840040
Outgroup
Asparagales	Allium	Allium cepa L.	GenBank	-	NC_030100
Arecales	Cocos	Cocos nucifera L.	GenBank	-	NC_031696
	Phoenix	Phoenix dactylifera L.	GenBank	-	NC_016740
